# Supplementary material for: Fungal Pathogen Emergence: Investigations with an Ustilago maydis × Sporisorium reilianum Hybrid
Source: MDPI journal article supplement (doi:10.3390/jof7080672), 2021-08-20
Supplement: s1 [file s1]

## Supplementary Material

**Table S1.** Primers used in this study

| Primer <sup>a,b</sup>        | Nucleotide Sequence (5' to 3') <sup>c</sup> | Amplicon Size (bp) <sup>d</sup> | Tm (°C) |
|------------------------------|---------------------------------------------|---------------------------------|---------|
| RT-PCR                       |                                             |                                 |         |
| <i>gapdh</i> (UMAG_02491) F1 | AGGTCAACATCGGTATCAACG                       | 359/766 <sup>d</sup>            | 64      |
| <i>gapdh</i> (UMAG_02491) R1 | GAGATGACGACCTTCTTGG                         |                                 |         |
| <i>gapdh</i> (sr10940.1) F1  | AGGTCAACATCGGTATCAACG                       | 359/806 <sup>d</sup>            | 64      |
| <i>gapdh</i> (sr10940.1) R1  | GAGATGACGACCTTCTTGG                         |                                 |         |
| <i>Ustilago maydis</i>       |                                             |                                 |         |
| <i>rbf1</i> (UMAG_03172) F1  | AAGGTACGTTCAACGGCATT                        | 194                             | 66      |
| <i>rbf1</i> (UMAG_03172) R1  | AGCCGACTGTTGCATCTCAA                        |                                 |         |
| <i>dik6</i> (UMAG_03070) F1  | AACACAAGCACAACAGGTGC                        | 223                             | 66      |
| <i>dik6</i> (UMAG_03070) R1  | TGCAGTGATAACGCCTGGAG                        |                                 |         |
| <i>kpp6</i> (UMAG_02331) F1  | GCATCGAGTCATCCGTACCC                        | 118                             | 66      |
| <i>kpp6</i> (UMAG_02331) R1  | CTTGAGATCGCGGTGGATCA                        |                                 |         |
| <i>biz1</i> (UMAG_02549) F1  | GGACACATATCACCCACGG                         | 154                             | 64      |
| <i>biz1</i> (UMAG_02549) R1  | GCGTAGGGTAGGATGGCAAA                        |                                 |         |
| <i>hdp1</i> (UMAG_12024) F1  | TACTCGCACCGGCATTACTC                        | 213                             | 64      |
| <i>hdp1</i> (UMAG_12024) R1  | GATCCCCGCTCCGTTATCTG                        |                                 |         |
| <i>zfp1</i> (UMAG_01961) F1  | CTGGGTTTGGTGATCCGTGA                        | 164                             | 66      |
| <i>zfp1</i> (UMAG_01961) R1  | CTGGCTGAATCACCGTCCTT                        |                                 |         |
| <i>hdp2</i> (UMAG_04928) F1  | ACGTATCGGAGTTCAACGCAT                       | 117                             | 68      |
| <i>hdp2</i> (UMAG_04928) R1  | GTTGGTGTTTTCAGCTCTGCC                       |                                 |         |
| <i>nlt1</i> (UMAG_04778) F1  | GTGGTCGGTGGACAAGCTAT                        | 111                             | 66      |
| <i>nlt1</i> (UMAG_04778) R1  | CAATCCGTATCCCTTGCTGT                        |                                 |         |
| <i>pep1</i> (UMAG_01987) F1  | TCTCTAGCACTCGTCTGCT                         | 95                              | 64      |
| <i>pep1</i> (UMAG_01987) R1  | GGTTGCGGGTCTACCTTGAA                        |                                 |         |
| <i>pit2</i> (UMAG_01375) F1  | ATCAAGAATCCGCCTGCCAA                        | 109                             | 66      |
| <i>pit2</i> (UMAG_01375) R1  | CTCCGTTAGGATCTGTCCGC                        |                                 |         |
| <i>tin2</i> (UMAG_05302) F1  | GAAGACGGAAAGTGGGCAGA                        | 166                             | 66      |
| <i>tin2</i> (UMAG_05302) R1  | GTGCAGCTGGATCTTCTGGT                        |                                 |         |
| <i>cce1</i> (UMAG_12197) F1  | CGCAGGATGGTAAACCCGAA                        | 162                             | 64      |
| <i>cce1</i> (UMAG_12197) R1  | TTCGGGAGAAGGGGCTAGTT                        |                                 |         |
| <i>Sporisorium reilianum</i> |                                             |                                 |         |
| <i>rbf1</i> (Sr14215) F1     | GGGTGCTACGCCTTCGTATC                        | 231                             | 68      |
| <i>rbf1</i> (Sr14215) R1     | TCGGATGCACCGGCAGTGTG                        |                                 |         |
| <i>dik6</i> (Sr14129) F1     | ACAGGGTTGGTCAGGAGAGT                        | 101                             | 66      |
| <i>dik6</i> (Sr14129) R1     | GTTGGTCGGGTCCATCTTGA                        |                                 |         |
| <i>kpp6</i> (Sr13532) F1     | ACATCCGATCCATGCCCTTC                        | 141                             | 68      |
| <i>kpp6</i> (Sr13532) R1     | GTGCCAGACACTCCTCCAC                         |                                 |         |
| <i>biz1</i> (Sr11022) F1     | CAGACCTCGTCGTATGCCAA                        | 236                             | 66      |

|                               |                        |     |    |
|-------------------------------|------------------------|-----|----|
| <i>biz1</i> (Sr11022) R1      | CCGTTACTCTCGCCAACCAA   |     |    |
| <i>hdp1</i> (Sr16095) F1      | GTCACGAGCCAGAAGGAGAG   | 89  | 64 |
| <i>hdp1</i> (Sr16095) R1      | CTCTGCACGTACACCTCGTC   |     |    |
| <i>zfp1</i> (Sr10717) F1      | CGTATTCAACCGACCGCCTT   | 135 | 66 |
| <i>zfp1</i> (Sr10717) R1      | CGGGCATACGATCCAAGGAC   |     |    |
| <i>hdp2</i> (Sr15806) F1      | CTGATGGCAAAGGATCGCCT   | 105 | 66 |
| <i>hdp2</i> (Sr15806) R1      | TTGCAGACGACTCACCATCC   |     |    |
| <i>nlt1</i> (sr15650) F1      | GTCCGATTACCTCGATCAC    | 129 | 66 |
| <i>nlt1</i> (sr15650) R1      | GCCTTGGATGCTGAGATACC   |     |    |
| <i>pep1</i> (Sr12947) F1      | GCACCACACTCGTTCAAACC   | 159 | 68 |
| <i>pep1</i> (Sr12947) R1      | CTTCGACCGACGAGTACCAG   |     |    |
| <i>pit2</i> (Sr10529) F1      | ATGCCAGCCATGCGTCGAT    | 102 | 66 |
| <i>pit2</i> (Sr10529) R1      | TCCGAAGTCGAAGAACCAGC   |     |    |
| <i>tin2</i> (Sr10057) F1      | CGCCAGACCAGGATCTGTTT   | 317 | 66 |
| <i>tin2</i> (Sr10057) R1      | CCAGACATTCGGGGTTGACA   |     |    |
| <i>cce1</i> (Sr13927) F1      | CCGCTTCTATGGAACCTGCAAA | 147 | 66 |
| <i>cce1</i> (Sr13927) R1      | GCCCAGAACTTGTTGAGCCA   |     |    |
| RT-qPCR                       |                        |     |    |
| <i>Ustilago maydis</i>        |                        |     |    |
| <i>gapdh</i> (UMAG_02491) F4  | CCGTTGTGTCTCAGGACTTC   | 122 | 66 |
| <i>gapdh</i> (UMAG_02491) R4  | GTAACCCCACTCGTTGTCGT   |     |    |
| <i>rbf1</i> (UMAG_03172) F8.2 | TTCAGACCCGCATTCCAACA   | 96  | 66 |
| <i>rbf1</i> (UMAG_03172) R5.2 | GCTCAAGCGTTCGTGGCTAGT  |     |    |
| <i>hdp2</i> (UMAG_04928) F6   | CTGTTTCAGGCGTTAGCGAGA  | 124 | 66 |
| <i>hdp2</i> (UMAG_04928) R6   | AGCCCAAAGTTGTCAGCAGT   |     |    |
| <i>nlt1</i> (UMAG_04778) F1   | GTGGTCGGTGGACAAGCTAT   | 111 | 66 |
| <i>nlt1</i> (UMAG_04778) R1   | CAATCCGTATCCCTTGCTGT   |     |    |
| <i>pit2</i> (UMAG_01375) F1   | ATCAAGAATCCGCCTGCCAA   | 109 | 66 |
| <i>pit2</i> (UMAG_01375) R1   | CTCCGTTAGGATCTGTCTGGC  |     |    |
| <i>tin2</i> (UMAG_05302) F5   | CCCCTGACAGTCGGAAGGTA   | 122 | 64 |
| <i>tin2</i> (UMAG_05302) R1   | GTGCAGCTGGATCTTCTGGT   |     |    |
| <i>cce1</i> (UMAG_12197) F2   | TCTCAGGCGTCTGTAAAGCA   | 112 | 64 |
| <i>cce1</i> (UMAG_12197) R2   | CAGAAGATTCCGGGAGAAGGGG |     |    |
| <i>Sporisorium reilianum</i>  |                        |     |    |
| <i>gapdh</i> (sr10940.1) F4   | TCTGTGGTACGACAACGAGTG  | 98  | 66 |
| <i>gapdh</i> (sr10940.1) R4   | CAAAGCCTCGAAGCACCG     |     |    |
| <i>rbf1</i> (Sr14215) F4      | CTCTTCTAGCACCAGCAATG   | 81  | 64 |
| <i>rbf1</i> (Sr14215) R4      | CTGCTCGAAACGTAGCCCGA   |     |    |
| <i>hdp2</i> (Sr15806) F2      | CTGATGGCAAAGGATCGCCT   | 105 | 66 |
| <i>hdp2</i> (Sr15806) R2      | TTGCAGACGACTCACCATCC   |     |    |
| <i>nlt1</i> (sr15650) F1      | GTCCGATTACCTCGATCAC    | 129 | 66 |
| <i>nlt1</i> (sr15650) R1      | GCCTTGGATGCTGAGATACC   |     |    |
| <i>pit2</i> (Sr10529) F4      | TCCTCAGGATCCCGGAAGAC   | 129 | 66 |

|                          |                                  |      |    |
|--------------------------|----------------------------------|------|----|
| <i>pit2</i> (Sr10529) R4 | AGTGGACGTACTGCCAATCG             |      |    |
| <i>tin2</i> (Sr10057) F1 | CTTCGTGGCACCCTCTTCTT             | 102  | 64 |
| <i>tin2</i> (Sr10057) R1 | CGAGGAAGAGGCACCGATAC             |      |    |
| <i>cce1</i> (Sr13927) F2 | GAAGCCACCGAGTACGGC               | 110  | 66 |
| <i>cce1</i> (Sr13927) R1 | GCCCAGAACTTGTTGAGCCA             |      |    |
| Expression Vectors       |                                  |      |    |
| <i>UMAG_rbf1</i>         |                                  |      |    |
| UMAG_03172 ORF F1        | ggaccatggATGGACATCTTGGAAGTACTAGT | 1235 | 60 |
| UMAG_03172 ORF R1        | ggagcggccgcCTAGGCGCTCTGCAGTTGAG  |      |    |
| UMAG_03172 F1-seq        | ATGGACATCTTGGAAGTACTAGT          |      |    |
| UMAG_03172 R1-seq        | AAAGGGACGTTCTTGCTGT              |      |    |
| UMAG_03172 F2-seq        | ACTGGCGAGCGACCTCACGT             |      |    |
| UMAG_03172 F1            | AGTACGAGCTACGACGGATTC            |      |    |
| UMAG_03172 R1            | GGGTAGGTGTTGGACACATTC            |      |    |
| UMAG_03172 F2            | ATGGTAGCGATGCTTGACAA             |      |    |
| UMAG_03172 R2            | CTAGTAGCAGGCTGAGTGAGG            |      |    |
| UMAG_03172 F4            | AAGGTACGTTACCGGCATT              |      |    |
| UMAG_03172 R4            | AGCCGACTGTTGCATCTCAA             |      |    |
| UMAG_03172 F5            | CCGCATTCCAACAGCAACAA             |      |    |
| p123-seq-F1              | CTTTTGGGTGCCAGACTTTG             |      |    |
| p123-seq-R1              | TGACGTTGATCTCCTTGACG             |      |    |
| <i>UMAG_hdp2</i>         |                                  |      |    |
| p123otefhdp2-seq-F1      | GCAAGATGATGCGTCCACTA             |      |    |
| p123otefhdp2-seq-F2      | AGAAGAATCGCAATCCAACG             |      |    |
| p123otefhdp2-seq-F3      | AGGGAGTTCGTGTGCCTCTA             |      |    |
| p123otefhdp2-seq-F4      | ATGCACGTTTCAATGCAGAG             |      |    |
| p123otefhdp2-seq-F5      | CTTCTTCGGGCATCTTTGAC             |      |    |
| p123otefhdp2-seq-F6      | TAGAAGCGACCAGGAGCATC             |      |    |
| p123otefhdp2-seq-F7      | GCTGAAAACACCAACGATGA             |      |    |
| p123otefhdp2-seq-R1      | GGAAAGACATTGGGAGCGTA             |      |    |
| p123otefhdp2-seq-R2      | CGAGTAGAGCCAAAGCATCC             |      |    |
| p123otefhdp2-seq-R3      | TTGCTGTGAGCATCCTTGTC             |      |    |
| p123otefhdp2-seq-R4      | GCTTGGTGATCCTCGGTAAA             |      |    |
| p123otefhdp2-seq-R5      | CGAGCTACCCAAAGCTGAAC             |      |    |
| p123otefhdp2-seq-R6      | GTCAGCGTTCGATGACTCAA             |      |    |
| p123otefhdp2-seq-R7      | CCAGTATCTACGCCGCTCAT             |      |    |
| UMAG_04928ORFseqF1       | ATGTCACAACGACCGCAGAG             |      |    |
| UMAG_04928ORFseqR1       | TTAGGGTTCAGCAGCGGCAG             |      |    |
| p123-seq-F1              | CTTTTGGGTGCCAGACTTTG             |      |    |
| p123-seq-R1              | TGACGTTGATCTCCTTGACG             |      |    |
| <i>UMAG_pit2</i>         |                                  |      |    |
| UMAG_01375 ORF F1        | ggaggatccATGCTGTTTCGCTCAGCCTT    | 383  | 60 |
| UMAG_01375 ORF R1        | ggagcggccgcTTATTCCCAGATGACCACAT  |      |    |

|                                  |                                 |      |    |
|----------------------------------|---------------------------------|------|----|
| UMAG_01375 F1                    | ATCAAGAATCCGCCTGCCAA            |      |    |
| UMAG_01375 R1                    | CTCCGTTAGGATCTGTCTGGC           |      |    |
| p123-seq-F1                      | CTTTTGGGTGCCAGACTTTG            |      |    |
| p123-seq-R1                      | TGACGTTGATCTCCTTGACG            |      |    |
| <i>UMAG_cce1</i>                 |                                 |      |    |
| UMAG_12197 ORF F1                | ggaccatggATGCATCGACCAACTAGCCT   | 410  | 62 |
| UMAG_12197 ORF R1                | ggagcggccgcTTAGTGGTGTACTTGGGACC |      |    |
| UMAG_12197 F1                    | CGCAGGATGGTAAACCCGAA            |      |    |
| UMAG_12197 R1-Seq                | TTCGTCTCTGCCCTTCTTAT            |      |    |
| p123-seq-F1                      | CTTTTGGGTGCCAGACTTTG            |      |    |
| p123-seq-R1                      | TGACGTTGATCTCCTTGACG            |      |    |
| <b>PCR Screens</b>               |                                 |      |    |
| Multi-Insert-F                   | ACCGCTGTTGAGATCCAGTTC           | 2445 | 64 |
| Multi-Insert-R                   | GATGCCGCATAGTTAAGTCCT           |      |    |
| p123-seq-F1                      | CTTTTGGGTGCCAGACTTTG            |      |    |
| UMAG_03172 R1-seq <sup>b</sup>   | AAAGGGACGTTCTTGGCTGT            | 303  | 62 |
| p123otefhdp2-seq-R1 <sup>b</sup> | GGAAAGACATTGGGAGCGTA            | 433  | 62 |
| Um04778 Seq 1R <sup>b</sup>      | TGCTGTAGTGAAACGTTGCC            | 846  | 62 |
| UMAG_01375 R1 <sup>b</sup>       | CTCCGTTAGGATCTGTCTGGC           | 474  | 62 |
| UMAG_12197 R1 <sup>b</sup>       | TTCGGGAGAAGGGGCTAGTT            | 496  | 62 |

<sup>a</sup> F: forward; R: reverse

<sup>b</sup> Paired with p123-seq-F1

<sup>c</sup> Lower-case letters in primer sequences represent tags containing restriction enzyme sites

<sup>d</sup> Amplicon size containing an intron

**Table S2.** *U. maydis* characterized genes and *S. reilianum* orthologs selected for investigation in the hybrid

| Gene                      | Function                                                                                                                            | Virulence of Gene Deletion | Study                       | <i>S. reilianum</i> (% Identity) <sup>a</sup> |       |
|---------------------------|-------------------------------------------------------------------------------------------------------------------------------------|----------------------------|-----------------------------|-----------------------------------------------|-------|
| <i>rbf1</i><br>UMAG_03172 | Master regulator that facilitates early sexual and pathogenic development, involved in filament formation, and G2 cell cycle arrest | Severely attenuated        | Heimel et al. [1]           | <i>sr14215</i>                                | 69.9% |
| <i>biz1</i><br>UMAG_02549 | Involved in appressorium formation, regulates G2 cell cycle arrest, and induces early wave effectors                                | Severely attenuated        | Flor-Parra et al. [2]       | <i>sr11022</i>                                | 53.4% |
| <i>hdp1</i><br>UMAG_12024 | Involved in filament formation and regulates G2 cell cycle arrest                                                                   | No impact                  | Pothiratana [3]             | <i>sr16095</i>                                | 47.3% |
| <i>hdp2</i><br>UMAG_04928 | Involved in appressorium formation and induces early wave effectors                                                                 | Severely attenuated        | Lanver et al. [4]           | <i>sr15806</i>                                | 57.7% |
| <i>zfp1</i><br>UMAG_01961 | Influences fungal proliferation and effector expression                                                                             | Reduced                    | Cheung et al. (unpublished) | <i>sr10717</i>                                | 67.5% |

|                                         |                                                                                                                   |                     |                                         |                |       |
|-----------------------------------------|-------------------------------------------------------------------------------------------------------------------|---------------------|-----------------------------------------|----------------|-------|
| <b><i>ntl1</i></b><br><i>UMAG_04778</i> | Leaf specific tumor formation and regulates late wave effectors                                                   | Severely attenuated | Donaldson et al. [5]; Lanver et al. [6] | <i>sr15650</i> | 61.6% |
| <b><i>tin2</i></b><br><i>UMAG_05302</i> | Cytoplasmic effector, reduces lignin biosynthesis in plant cells, induces anthocyanin production                  | Reduced             | Tanaka et al. [7]                       | <i>sr10057</i> | 41.8% |
| <b><i>pit2</i></b><br><i>UMAG_01375</i> | Apoplastic effector, an inhibitor of plant cysteine proteases                                                     | Severely attenuated | Mueller et al. [8]                      | <i>sr10529</i> | 33.7% |
| <b><i>pep1</i></b><br><i>UMAG_01987</i> | Apoplastic core effector, an inhibitor of plant peroxidases                                                       | Severely attenuated | Doehlemann et al. [9]                   | <i>sr12947</i> | 65.2% |
| <b><i>cce1</i></b><br><i>UMAG_12197</i> | Apoplastic core effector, required for early infection                                                            | Severely attenuated | Seitner et al. [10]                     | <i>sr13927</i> | 63.9% |
| <b><i>dik6</i></b><br><i>UMAG_03070</i> | 7TM domain protein that functions in plant-pathogen interactions                                                  | No impact           | Weinzierl & Kamper (unpublished)        | <i>sr14129</i> | 92.1% |
| <b><i>kpp6</i></b><br><i>UMAG_02331</i> | Involved in appressorium formation and essential for plant penetration                                            | Severely attenuated | Brachmann et al. [11]                   | <i>sr13532</i> | 84.8% |
| <b><i>clp1</i></b><br><i>UMAG_02438</i> | Required for clamp-like structures, proliferation of filaments, and regulates UPR, <i>bE/bW</i> , and <i>rbf1</i> | Severely attenuated | Scherer et al. [12]; Heimel et al. [13] | <i>sr10863</i> | 63.0% |

<sup>a</sup> Percent identity calculated by alignment with *U. maydis* ortholog in protein blast

Genes indicated in orange were selected to be overexpressed in the hybrid

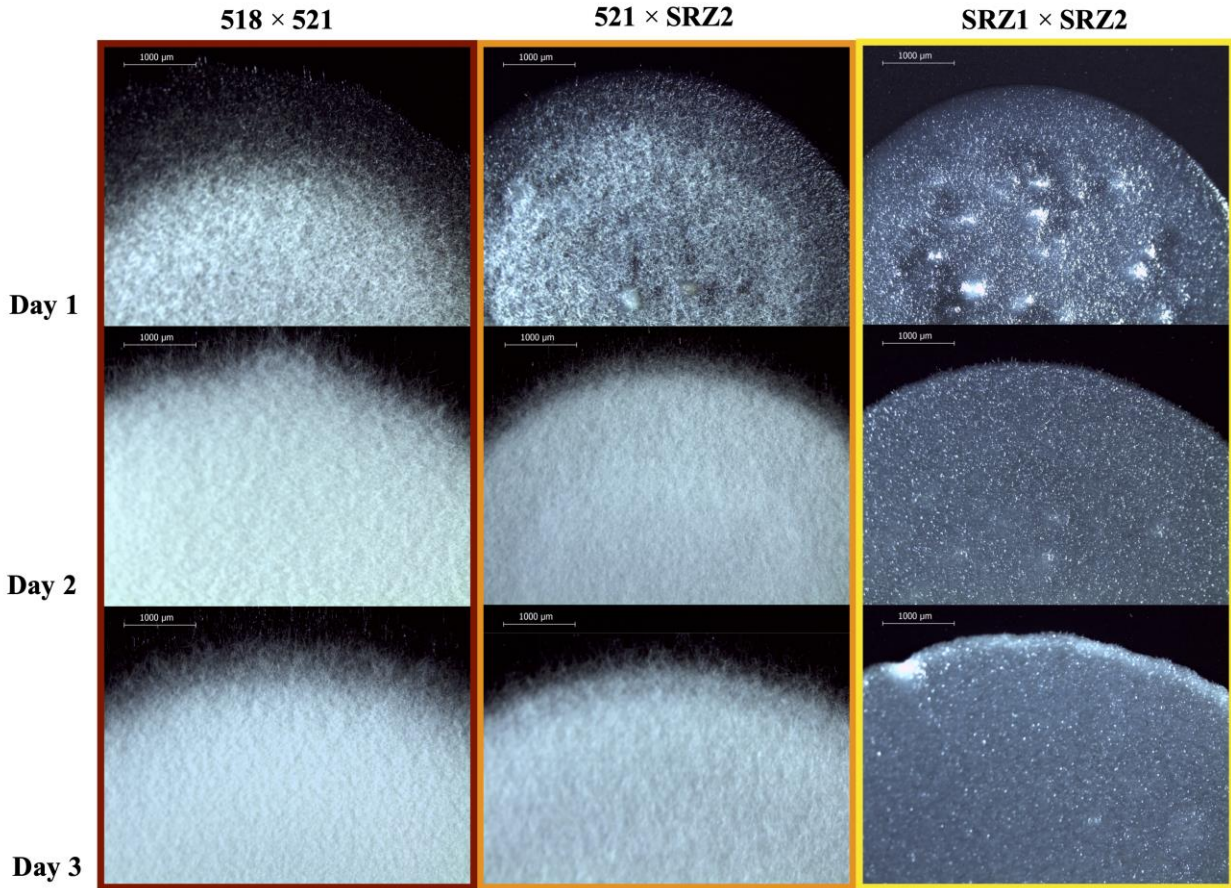

**Figure S1.** Hybrid dikaryon had slower filament development relative to the *U. maydis* dikaryon. Compatible haploids were pre-mixed and spotted onto PDA + charcoal plates and monitored over three days. Filamentation of the 521 × SRZ2 developed slower than that of 518 × 521. Scale bar, 1000 µm.

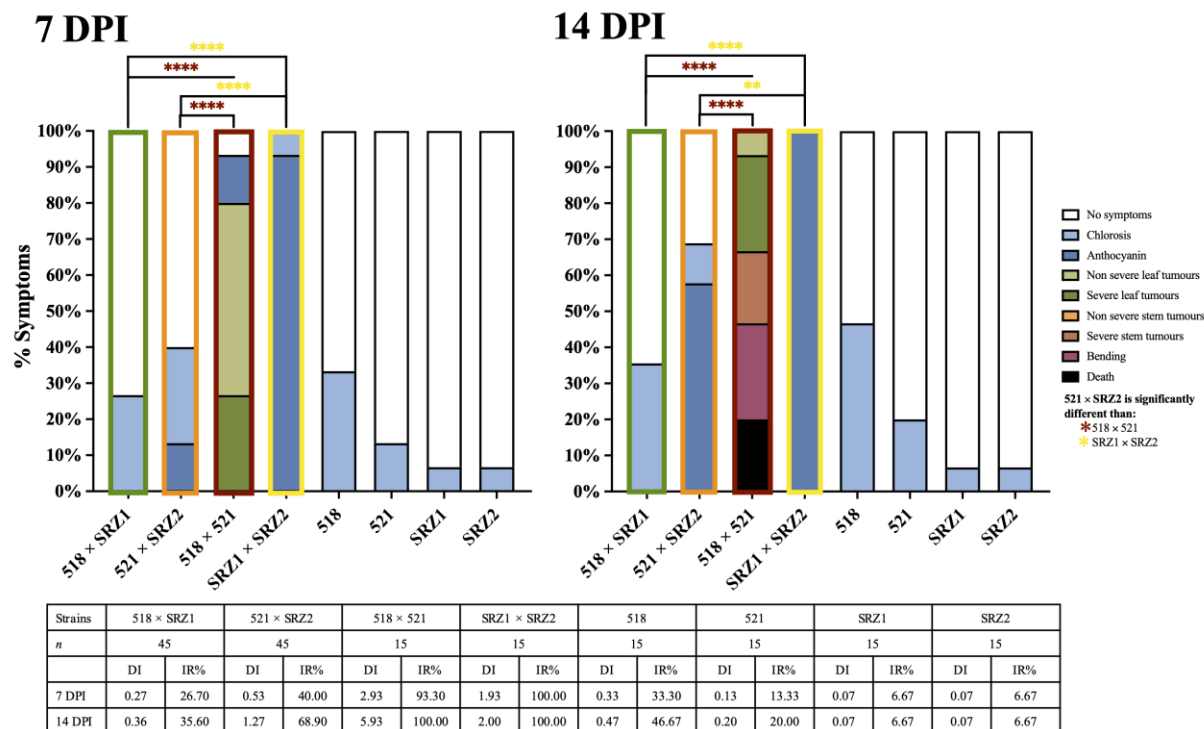

**Figure S2.** During infection of maize, 521 x SRZ2 induced minor symptoms of disease at 7 & 14 DPI. Colored bars represent the percentage of plants that developed the symptoms indicated the legend. The table presents the number of plants infected ( $n$ ), disease index (DI), and infection rate (IR). One biological replicate is presented. Statistical differences were calculated using Mann-Whitney U tests (\*\*=  $p<0.01$ ; \*\*\*\*=  $p<0.0001$ ).

### A) 5 DPI

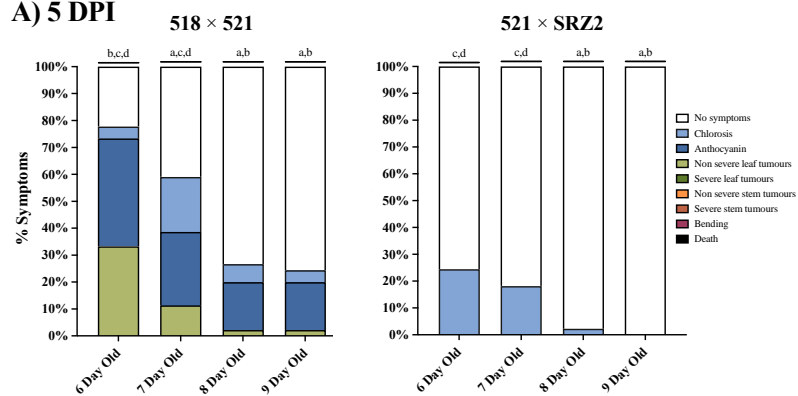

### B) 7 DPI

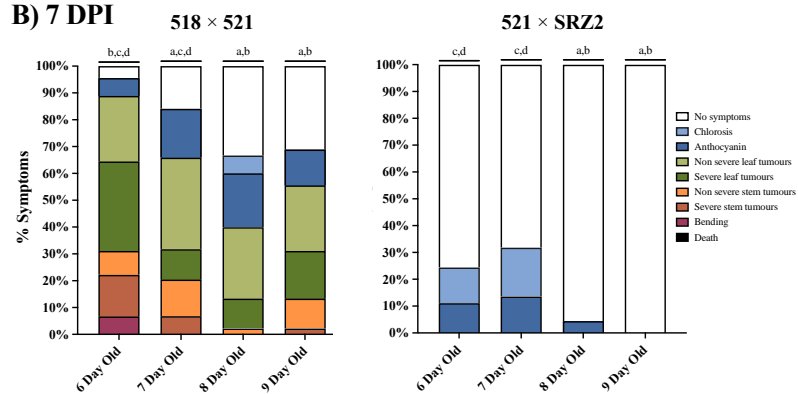

### C) 10 DPI

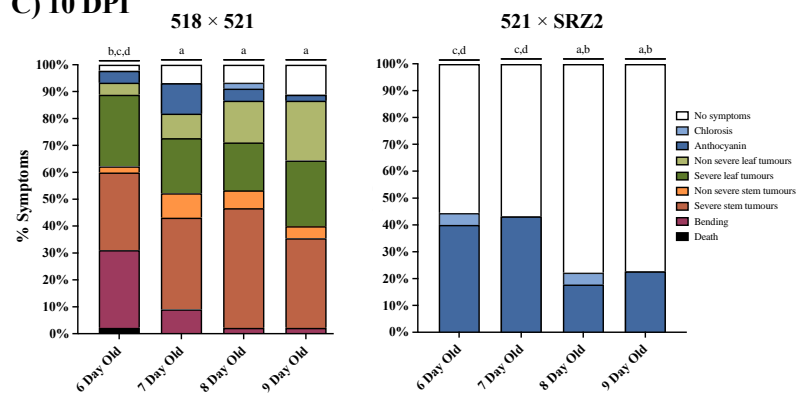

### D) 14 DPI

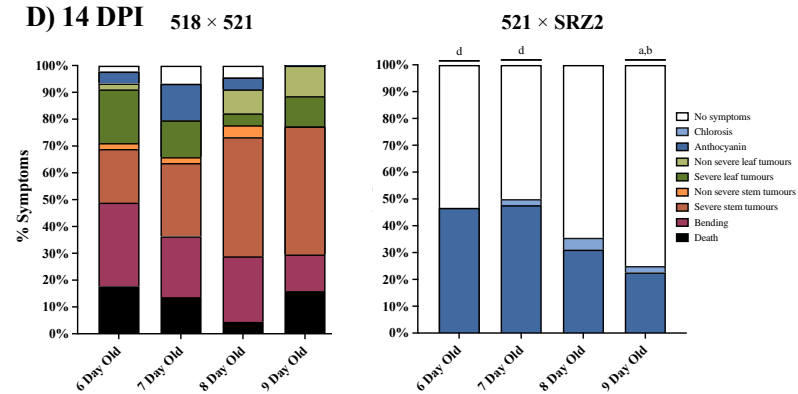



|        | Dikaryon | 518 × 521 |           |           |           | 521 × SRZ2 |           |           |           |
|--------|----------|-----------|-----------|-----------|-----------|------------|-----------|-----------|-----------|
|        | Age      | 6 Day Old | 7 Day Old | 8 Day Old | 9 Day Old | 6 Day Old  | 7 Day Old | 8 Day Old | 9 Day Old |
|        | n        | 45        | 44        | 45        | 45        | 45         | 44        | 45        | 44        |
| 5 DPI  | DI       | 1.84      | 1.09      | 0.49      | 0.47      | 0.24       | 0.18      | 0.02      | 0.00      |
|        | IR (%)   | 77.8      | 59.1      | 26.7      | 24.4      | 24.4       | 18.2      | 2.2       | 0.00      |
| 7 DPI  | DI       | 4.04      | 2.93      | 1.82      | 2.4       | 0.36       | 0.45      | 0.09      | 0.00      |
|        | IR (%)   | 95.6      | 84.1      | 66.7      | 68.9      | 24.4       | 31.8      | 4.4       | 0.00      |
| 10 DPI | DI       | 5.33      | 4.45      | 4.44      | 4.07      | 0.84       | 0.86      | 0.4       | 0.45      |
|        | IR (%)   | 97.8      | 93.2      | 93.3      | 88.9      | 44.4       | 43.2      | 22.2      | 22.7      |
| 14 DPI | DI       | 5.87      | 5.25      | 5.49      | 5.8       | 0.93       | 0.98      | 0.67      | 0.48      |
|        | IR (%)   | 97.8      | 93.3      | 95.6      | 100       | 46.7       | 51.1      | 35.6      | 26.7      |

**Figure S3.** The ability of 521 × SRZ2 to infect was reduced when older *Z. mays* seedlings were inoculated. A) 5 DPI, B) 7 DPI, C) 10 DPI, and D) 14 DPI. Colored bars represent the percentage of plants that developed symptoms, as indicated in the legend. The table presents the number of plants infected (*n*), disease index (DI), and infection rate (IR). Statistical differences were calculated using Mann-Whitney U tests at *p*<0.05 (a, b, c, and d indicate significant differences from 6-, 7-, 8-, and 9-day old seedling inoculations, respectively). One experiment is represented.

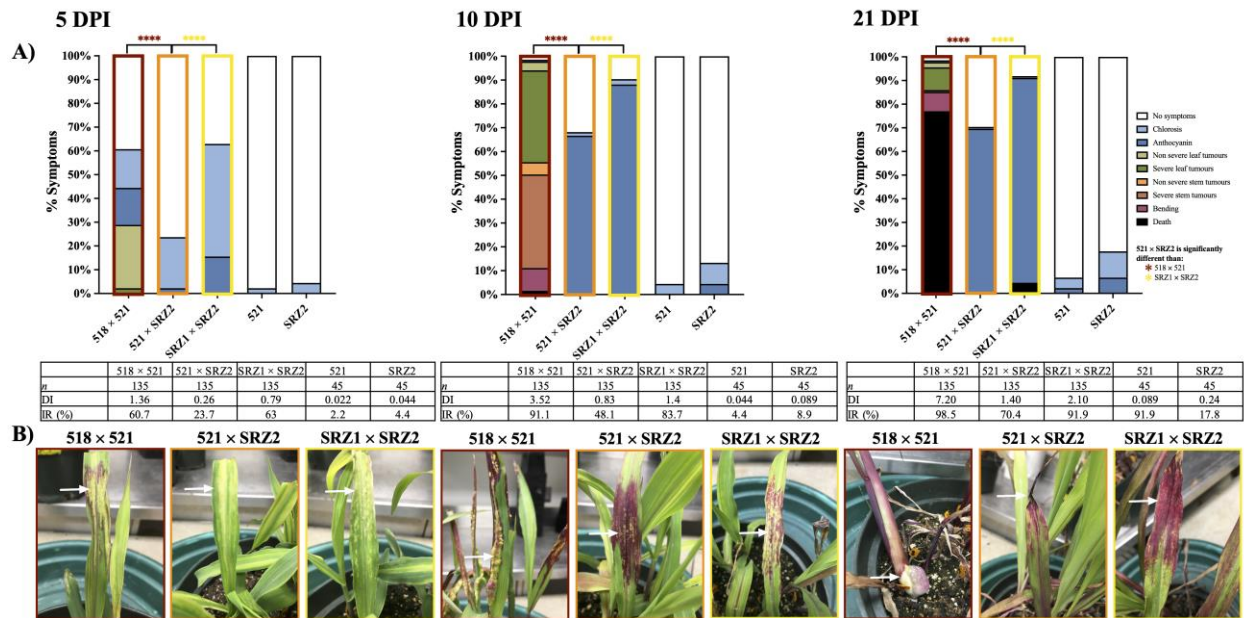

**Figure S4.** The hybrid was less virulent than the parental dikaryons at 5, 10, & 21 DPI. A) Colored bars represent the percentage of plants that developed symptoms, as indicated in the legend. Statistical differences were calculated using Mann-Whitney U tests (\*\*\*\* = *p*<0.0001). The table presents the number of plants infected (*n*), disease index (DI), and infection rate (IR). Three separate experiments were conducted, and combined results are presented. B) Representative symptoms, indicated by the arrows, for 518 × 521 infections are anthocyanin and chlorosis at 5 DPI, leaf tumors at 10 DPI, and stem tumors at 21 DPI, for 521 × SRZ2 infections are chlorosis at 5 DPI and anthocyanin at 10 & 21 DPI, and for SRZ1 × SRZ2 infections are chlorosis at 5 DPI, anthocyanin and chlorosis at 10 DPI, and anthocyanin at 21 DPI.

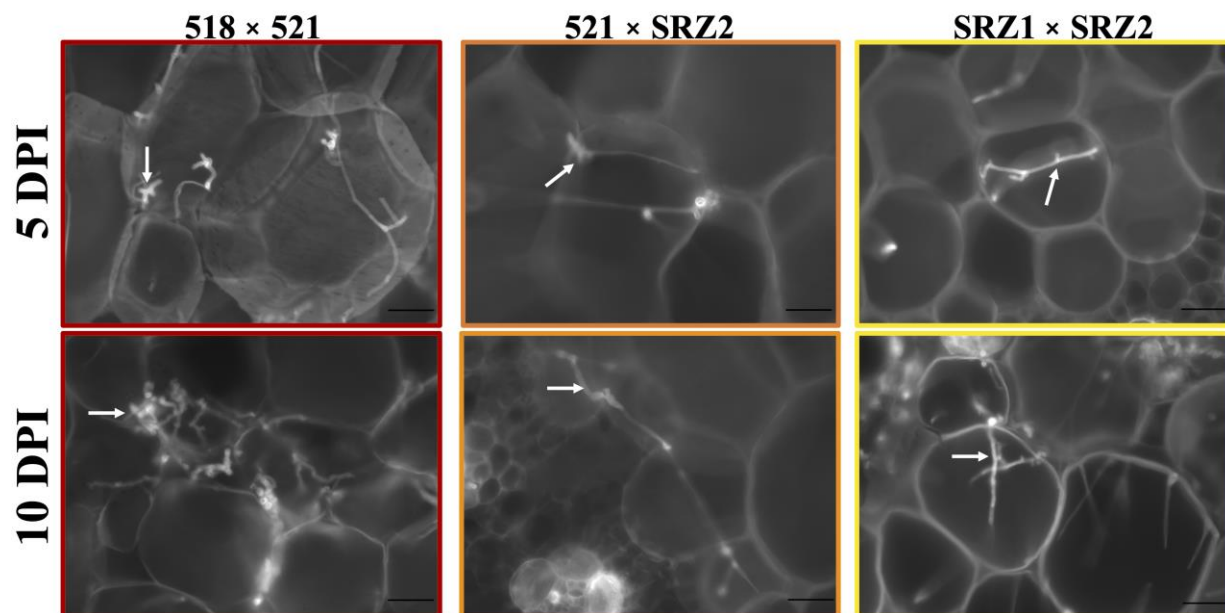

**Figure S5.** Hyphal growth during infections with the hybrid was reduced compared to parental dikaryon infections at 5 & 10 DPI. Infected plant leaves cross sectioned and were stained with Fungi-Fluor and viewed under Zeiss microscope at 400 $\times$ . White arrows indicate hyphal growth through plant cells and blue arrows indicate hyphal branching. Scale bar, 20  $\mu$ m.

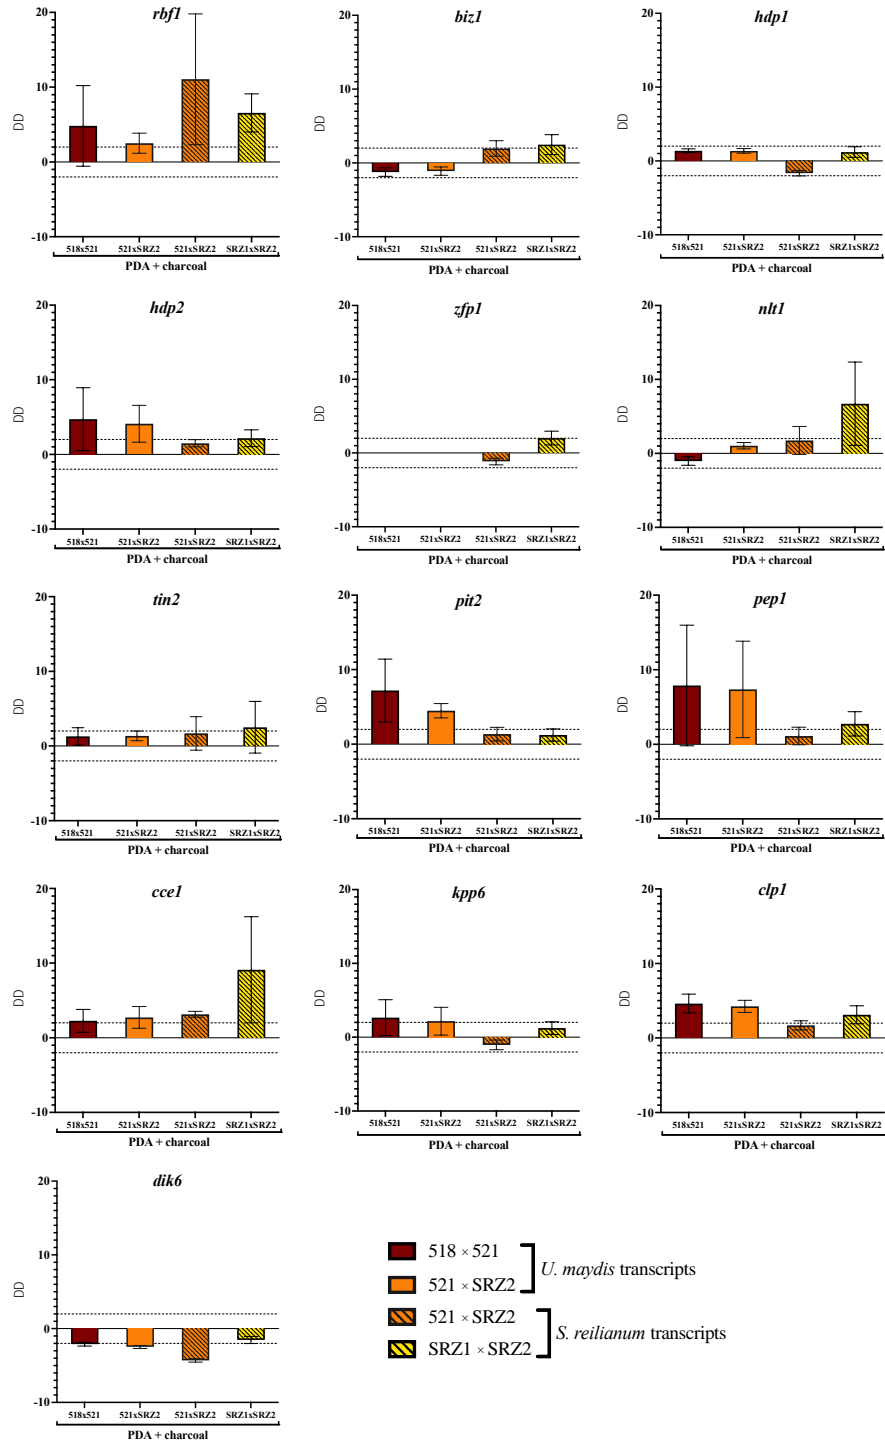

**Figure S6.** Transcript levels of key *U. maydis* virulence genes and their putative *S. reilianum* orthologues in the hybrid were similar to those of the parental dikaryons during growth on plates. RNA was isolated from mycelia harvested after three days growth on PDA + charcoal plates and used in RT-PCR. Band intensity was quantified in Image Studio Lite. Transcript intensity was normalized to the housekeeping gene (*gapdh*) and fold change was compared non-pathogenic haploids (521 or SRZ2) for reference. Three biological replicates were averaged with standard deviation (error bars). Transcripts with less than a two-fold change in either direction, indicated by the dashed lines at 2 and -2 on the y-axis, were considered unchanged.

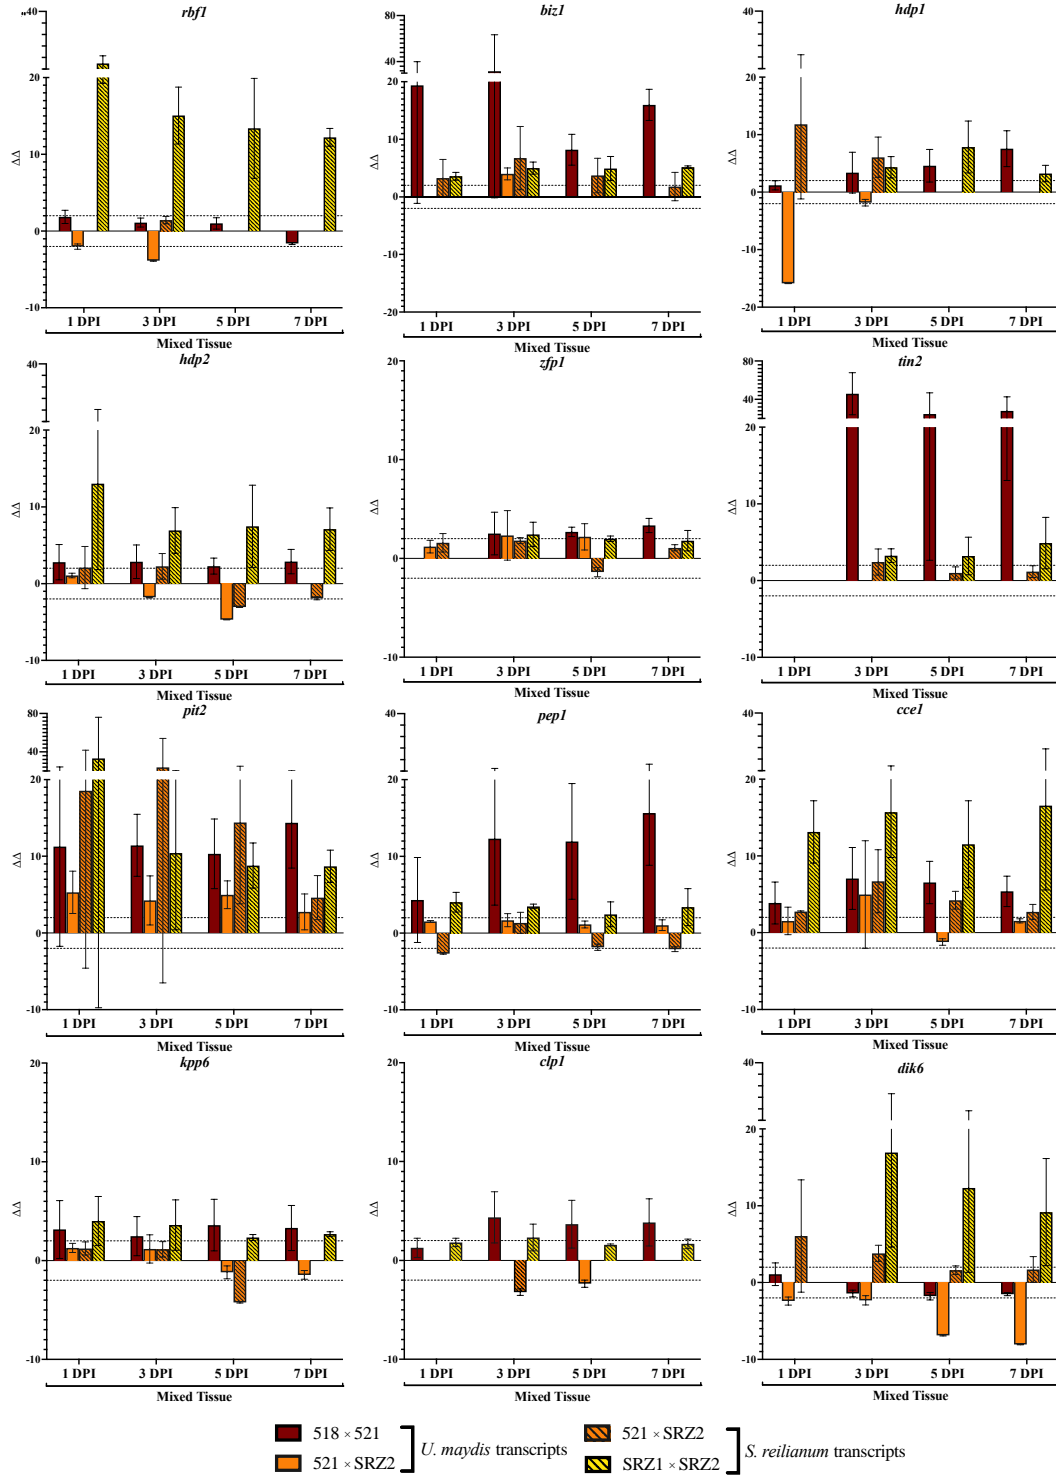

**Figure S7.** Transcript levels of key *U. maydis* virulence genes and their putative *S. reilianum* orthologues during the hybrid infection had reduced levels and altered expression patterns relative to those in parental dikaryon infections. RNA was isolated from infected plant tissue harvested at 1, 3, 5, & 7 DPI and used in RT-PCR. Band intensity was quantified in Image Studio Lite and transcript intensity was normalized to the housekeeping gene (*gapdh*) and fold change was compared to the axenically grown haploid (521 or SRZ2) for reference. Three biological replicates were averaged with standard deviation reported (error bars). Transcripts with less than a two-fold change in either direction, indicated by the lines at 2 and -2 on the y-axis, were considered unchanged.



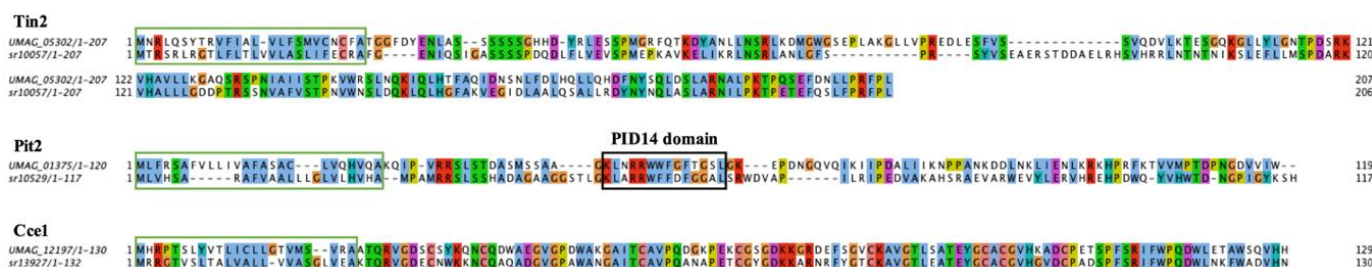

**Figure S8.** Signal peptides are not conserved between the *U. maydis* effectors and the proposed *S. reilianum* orthologs. *S. reilianum* predicted orthologs were identified using the RBH protein blast and aligned to the corresponding *U. maydis* proteins using MAFFT and visualized in Jalview with a ClustalX color scheme. Signal peptides identified using SignalP are indicated by a green box and functional domains are indicated by a black box. Pit2 contains a PID14 domain.

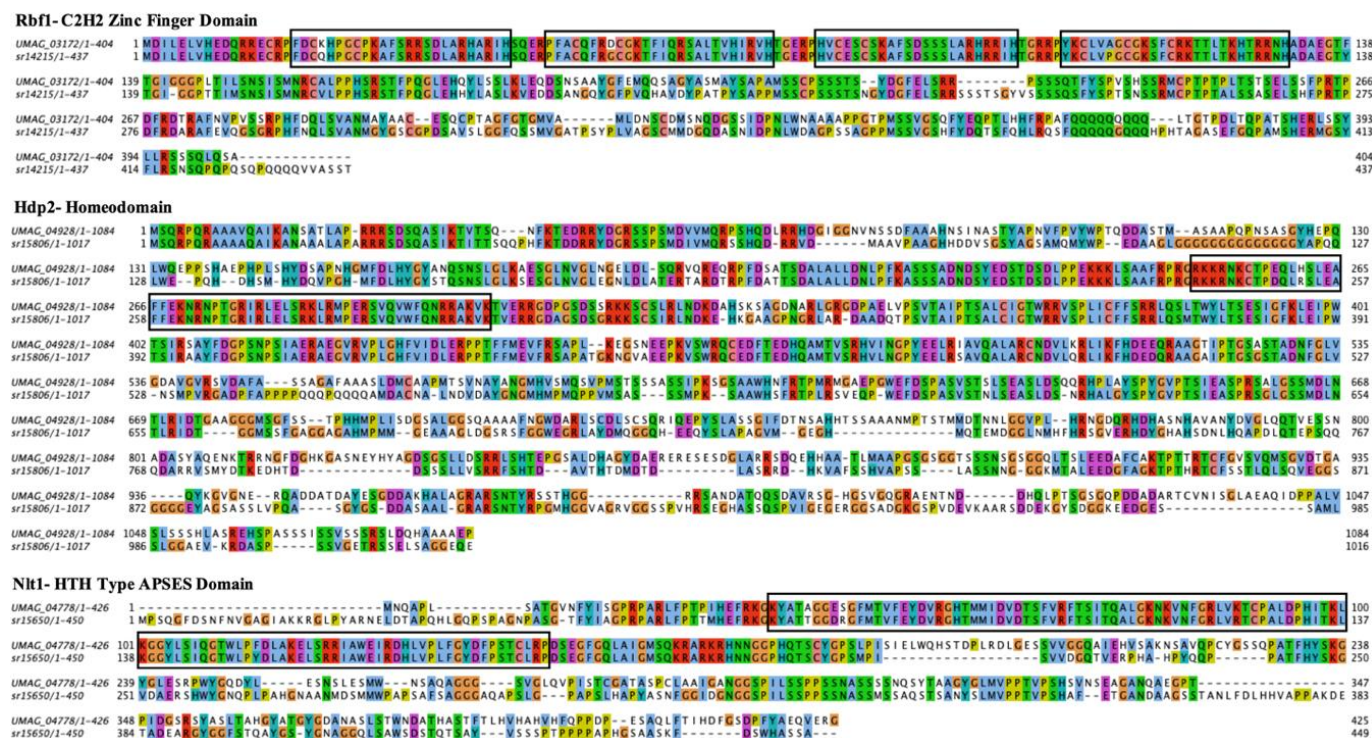

**Figure S9.** Transcription factor domains are conserved between *U. maydis* and the proposed *S. reilianum* orthologs. *S. reilianum* predicted orthologs were identified using the RBH protein blast and aligned to the corresponding *U. maydis* proteins using MAFFT and visualized in Jalview with a ClustalX color scheme. Domains, indicated by a black box, were identified through PROSITE and PFAM. Rbf1 contains the C2H2 zinc finger domains, Hdp2 contains a homeodomain, and Nlt1 contains an HTH APSES domain.

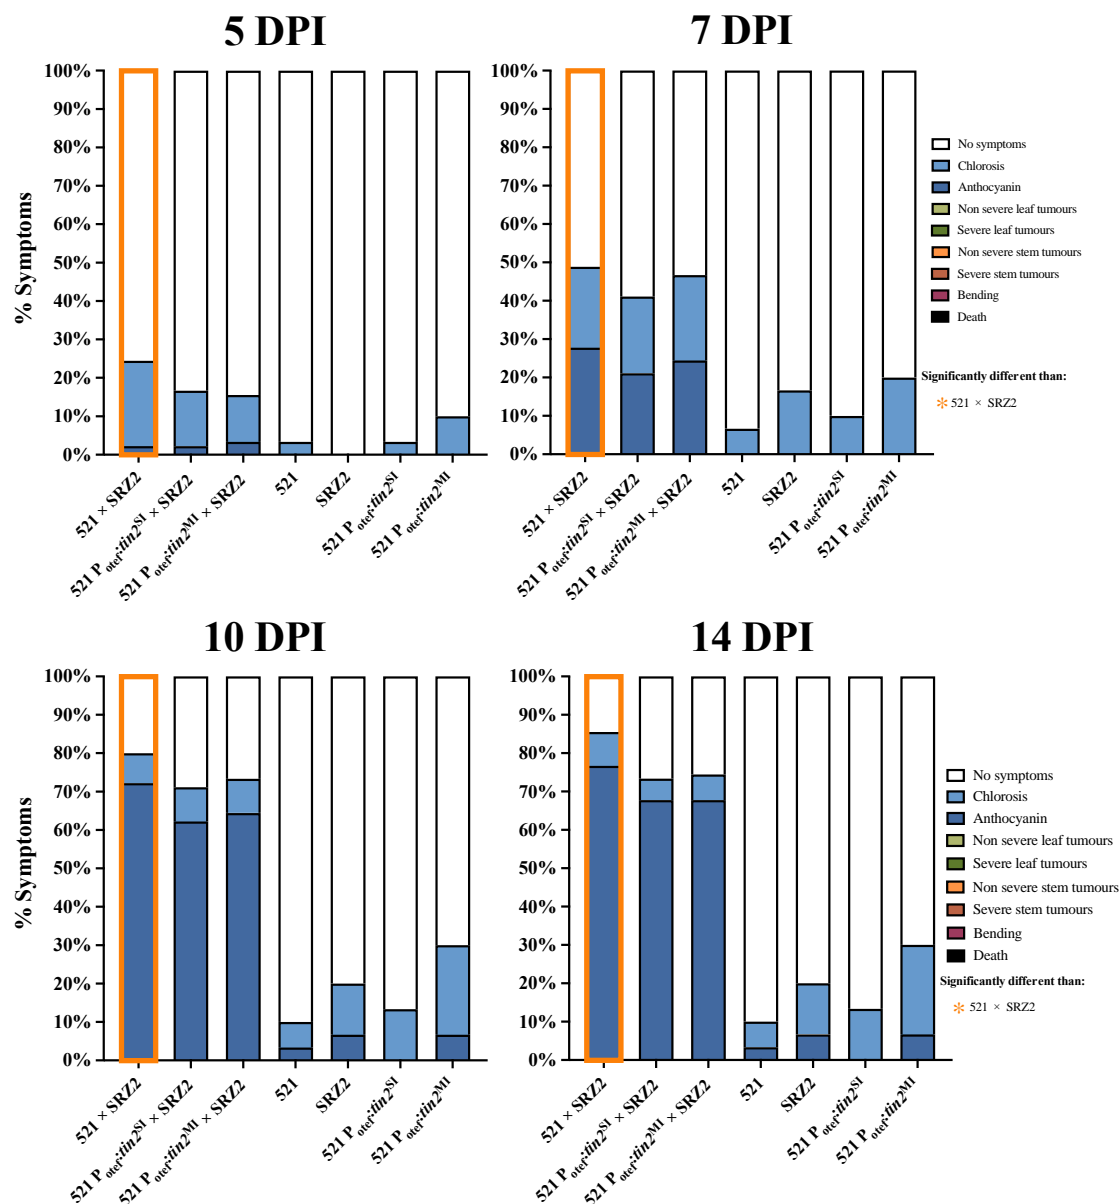

| Strains  | 521 x SRZ2 |      | 521 P <sub>odef:tin2<sup>SI</sup></sub> x SRZ2 |      | 521 P <sub>odef:tin2<sup>MI</sup></sub> x SRZ2 |      | 521  |      | SRZ2 |      | 521 P <sub>odef:tin2<sup>SI</sup></sub> |      | 521 P <sub>odef:tin2<sup>MI</sup></sub> |      |
|----------|------------|------|------------------------------------------------|------|------------------------------------------------|------|------|------|------|------|-----------------------------------------|------|-----------------------------------------|------|
| <i>n</i> | 90         |      | 90                                             |      | 90                                             |      | 45   |      | 45   |      | 45                                      |      | 45                                      |      |
|          | DI         | IR%  | DI                                             | IR%  | DI                                             | IR%  | DI   | IR%  | DI   | IR%  | DI                                      | IR%  | DI                                      | IR%  |
| 5 DPI    | 0.27       | 24.4 | 0.19                                           | 16.7 | 0.19                                           | 16.7 | 0.03 | 3.3  | 0.00 | 0.0  | 0.03                                    | 3.3  | 0.10                                    | 10.0 |
| 7 DPI    | 0.77       | 48.9 | 0.62                                           | 41.1 | 0.71                                           | 46.7 | 0.07 | 6.7  | 0.17 | 16.7 | 0.10                                    | 10.0 | 0.20                                    | 20.0 |
| 10 DPI   | 1.52       | 80.0 | 1.33                                           | 71.1 | 1.38                                           | 73.3 | 0.13 | 10.0 | 0.27 | 20.0 | 0.13                                    | 13.3 | 0.37                                    | 30.0 |
| 14 DPI   | 1.62       | 85.6 | 1.41                                           | 73.3 | 1.42                                           | 74.4 | 0.13 | 10.0 | 0.27 | 20.0 | 0.13                                    | 13.3 | 0.37                                    | 30.0 |

**Figure S10.** Constitutively expressing *tin2* in the hybrid had no observable impact on pathogenic development at 5, 7, 10, & 14 DPI. Symptoms were scored after infection of seven-day old *Z. mays* seedlings. Colored bars represent the percentage of plants that developed symptoms, as indicated in the legend. Mann-Whitney U tests found no significant difference. Table indicates the number of plants infected (*n*), disease index (DI), and infection rate (IR). Two separate experiments were conducted, and combined results are presented.

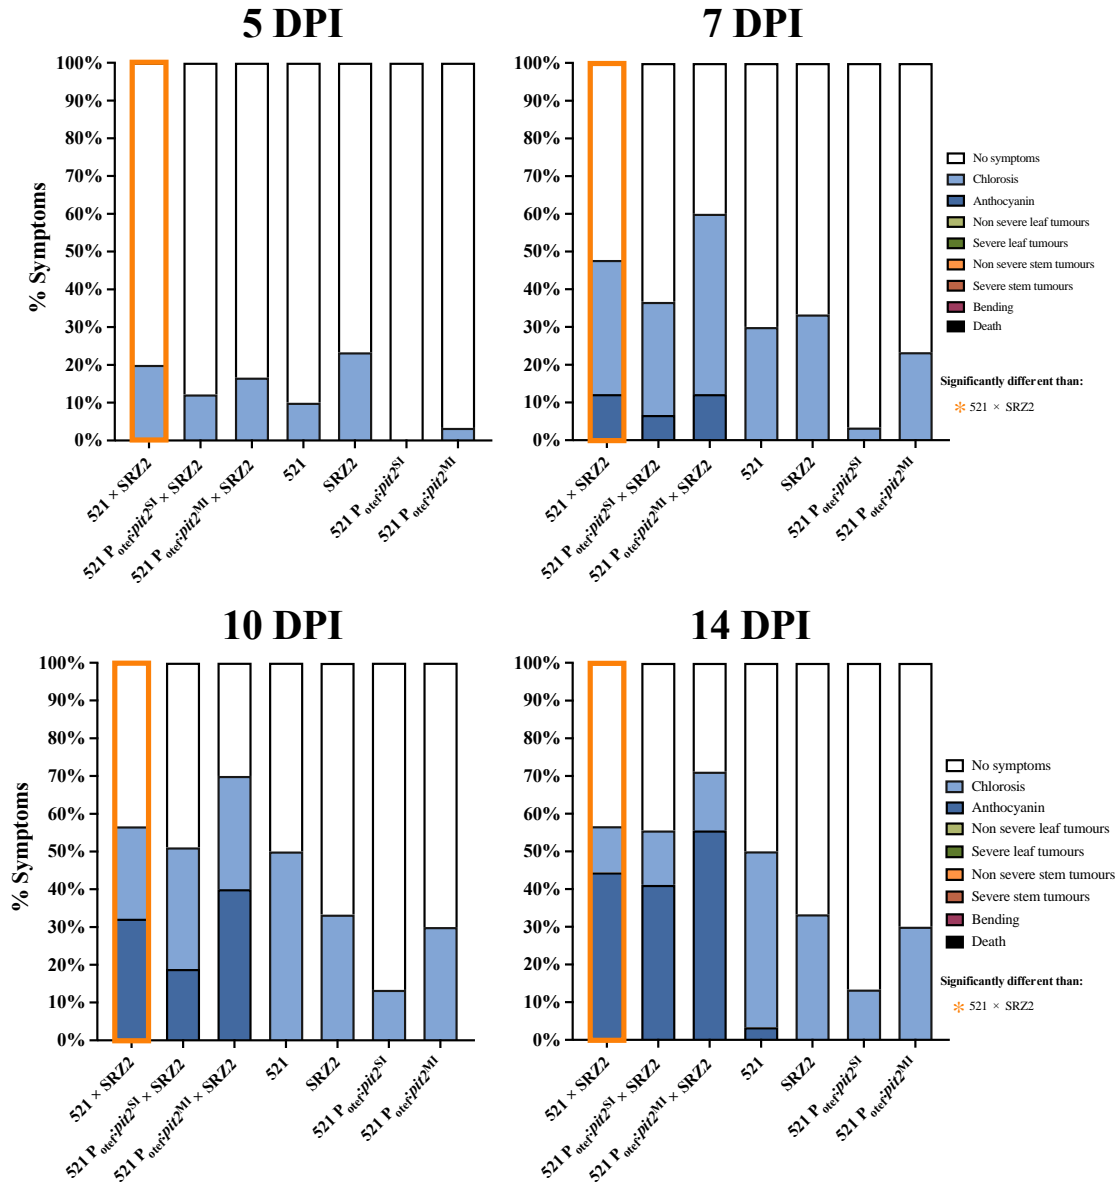

| Strains  | 521 x SRZ2 |      | 521 P <sub>oe</sub> : <i>pit2</i> <sup>SI</sup> x SRZ2 |      | 521 P <sub>oe</sub> : <i>pit2</i> <sup>MI</sup> x SRZ2 |      | 521  |      | SRZ2 |      | 521 P <sub>oe</sub> : <i>pit2</i> <sup>SI</sup> |      | 521 P <sub>oe</sub> : <i>pit2</i> <sup>MI</sup> |      |
|----------|------------|------|--------------------------------------------------------|------|--------------------------------------------------------|------|------|------|------|------|-------------------------------------------------|------|-------------------------------------------------|------|
| <i>n</i> | 90         |      | 90                                                     |      | 90                                                     |      | 45   |      | 45   |      | 45                                              |      | 45                                              |      |
|          | DI         | IR%  | DI                                                     | IR%  | DI                                                     | IR%  | DI   | IR%  | DI   | IR%  | DI                                              | IR%  | DI                                              | IR%  |
| 5 DPI    | 0.20       | 20.0 | 0.12                                                   | 12.2 | 0.17                                                   | 16.7 | 0.10 | 10.0 | 0.23 | 23.0 | 0.00                                            | 0.0  | 0.03                                            | 3.3  |
| 7 DPI    | 0.60       | 47.8 | 0.43                                                   | 36.7 | 0.72                                                   | 60.0 | 0.33 | 30.0 | 0.33 | 33.3 | 0.03                                            | 3.3  | 0.23                                            | 23.3 |
| 10 DPI   | 0.89       | 56.7 | 0.70                                                   | 51.1 | 1.10                                                   | 70.0 | 0.50 | 50.0 | 0.33 | 33.3 | 0.13                                            | 13.3 | 0.30                                            | 30.0 |
| 14 DPI   | 1.01       | 56.7 | 0.97                                                   | 55.6 | 1.27                                                   | 71.1 | 0.53 | 50.0 | 0.33 | 33.3 | 0.13                                            | 13.3 | 0.30                                            | 30.0 |

**Figure S11.** Constitutively expressing *pit2* in the hybrid had a slightly variable impact on infection rate at 5, 7, 10, & 14 DPI. Symptoms were scored after infection of seven-day old *Z. mays* seedlings. Colored bars represent the percentage of plants that developed symptoms, as indicated in the legend. Mann-Whitney U tests found no significant difference. Table indicates the number of plants infected (*n*), disease index (DI), and infection rate (IR). Two separate experiments were conducted, and combined results are presented.

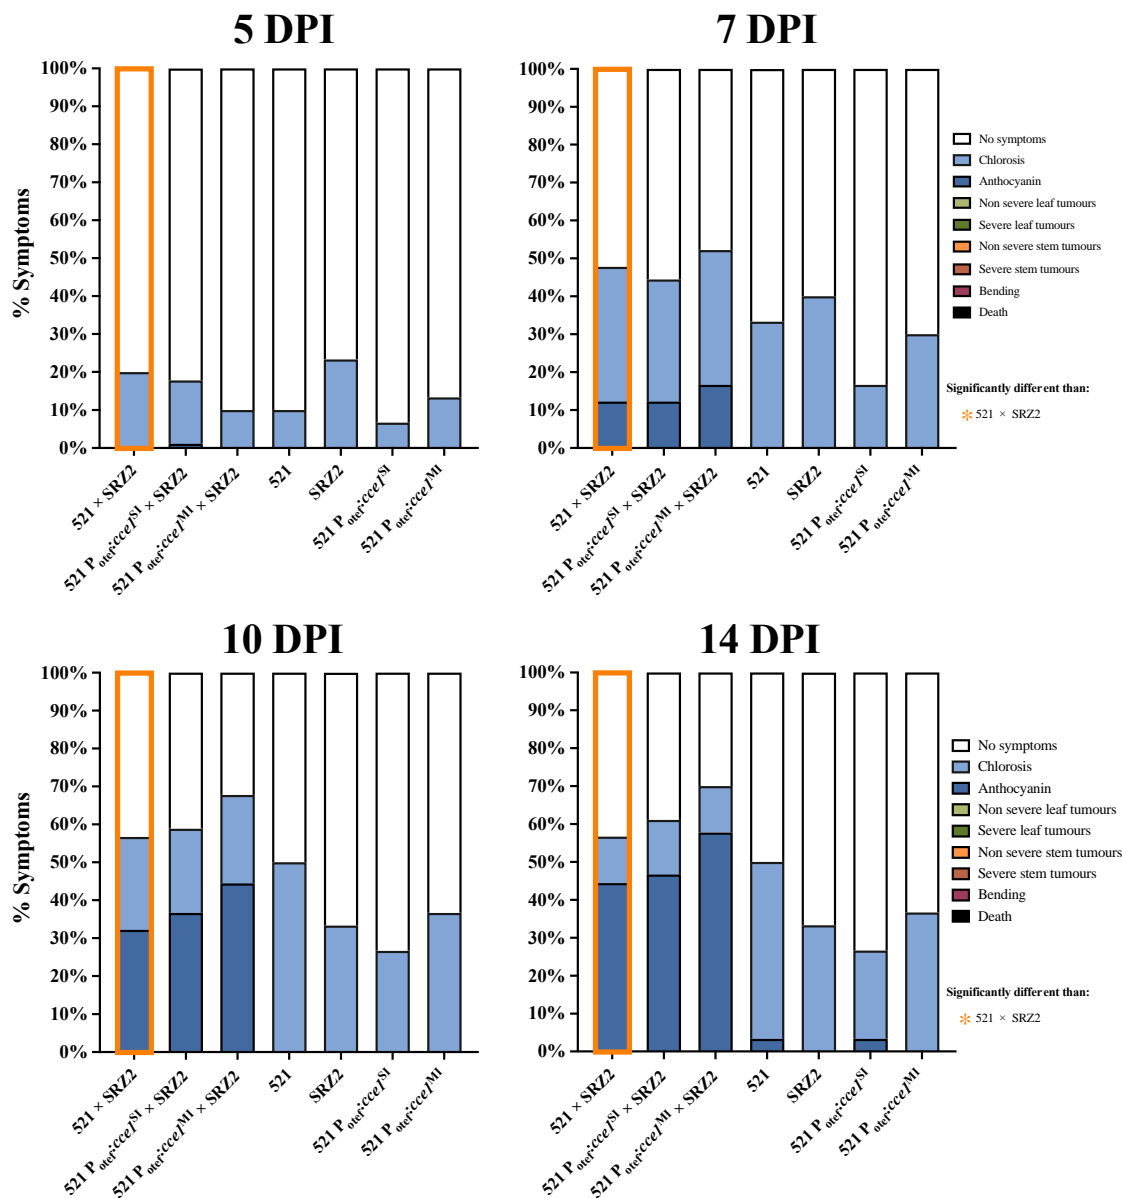

| Strains  | 521 x SRZ2 |      | 521 P <sub>otef:cce1</sub> <sup>SI</sup> x SRZ2 |      | 521 P <sub>otef:cce1</sub> <sup>MI</sup> x SRZ2 |      | 521  |      | SRZ2 |      | 521 P <sub>otef:cce1</sub> <sup>SI</sup> |      | 521 P <sub>otef:cce1</sub> <sup>MI</sup> |      |
|----------|------------|------|-------------------------------------------------|------|-------------------------------------------------|------|------|------|------|------|------------------------------------------|------|------------------------------------------|------|
| <i>n</i> | 90         |      | 90                                              |      | 90                                              |      | 45   |      | 45   |      | 45                                       |      | 45                                       |      |
|          | DI         | IR%  | DI                                              | IR%  | DI                                              | IR%  | DI   | IR%  | DI   | IR%  | DI                                       | IR%  | DI                                       | IR%  |
| 5 DPI    | 0.20       | 20.0 | 0.19                                            | 17.8 | 0.10                                            | 10.0 | 0.10 | 10.0 | 0.23 | 23.0 | 0.07                                     | 6.7  | 0.13                                     | 13.3 |
| 7 DPI    | 0.60       | 47.8 | 0.57                                            | 44.4 | 0.69                                            | 52.2 | 0.33 | 30.0 | 0.40 | 40.0 | 0.17                                     | 16.7 | 0.30                                     | 30.0 |
| 10 DPI   | 0.89       | 56.7 | 0.96                                            | 58.9 | 1.12                                            | 67.8 | 0.50 | 50.0 | 0.33 | 33.3 | 0.27                                     | 26.7 | 0.37                                     | 36.7 |
| 14 DPI   | 1.01       | 56.7 | 1.08                                            | 61.1 | 1.28                                            | 70.0 | 0.53 | 50.0 | 0.33 | 33.3 | 0.30                                     | 26.7 | 0.37                                     | 36.7 |

**Figure S12.** Constitutively expressing *cce1* slightly increased the infection rate compared to the unaltered hybrid at 5, 7, 10, & 14 DPI. Symptoms were scored after infection of seven-day old *Z. mays* seedlings. Colored bars represent the percentage of plants that developed symptoms, as indicated in the legend. Mann-Whitney U tests found no significant difference. Table indicates the number of plants infected (*n*), disease index (DI), and infection rate (IR). Two separate experiments were conducted, and combined results are presented.



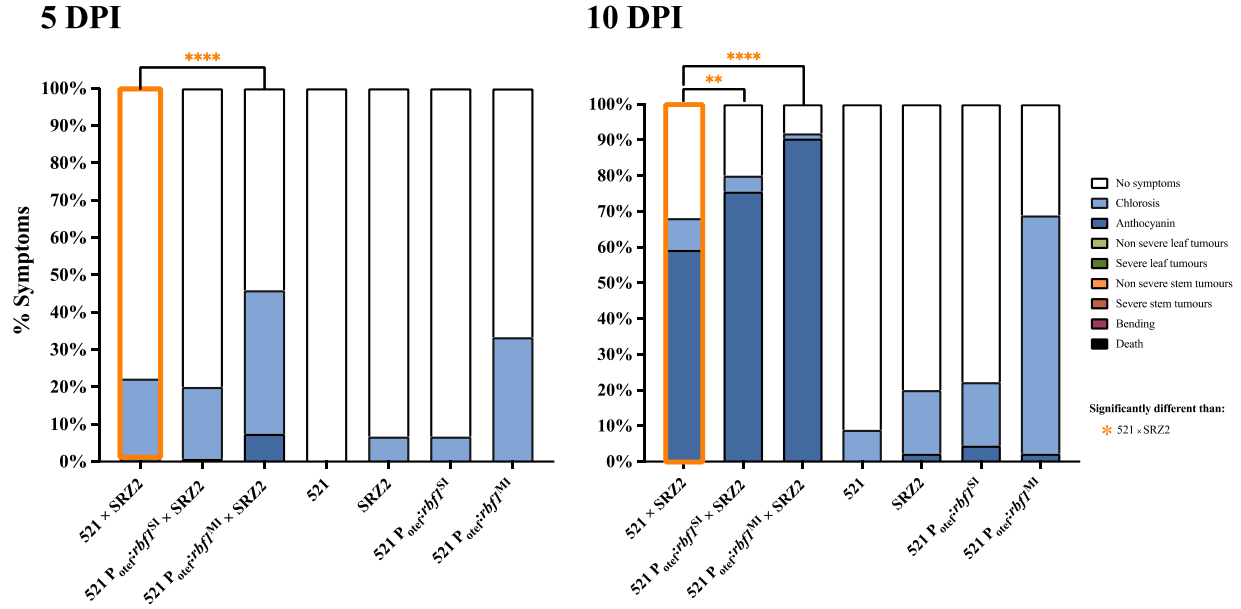

| Strains  | 521 x SRZ2 |      | 521 P <sub>otef::rbf1<sup>SI</sup></sub> x SRZ2 |      | 521 P <sub>otef::rbf1<sup>MI</sup></sub> x SRZ2 |      | 521  |     | SRZ2 |      | 521 P <sub>otef::rbf1<sup>SI</sup></sub> |      | 521 P <sub>otef::rbf1<sup>MI</sup></sub> |      |
|----------|------------|------|-------------------------------------------------|------|-------------------------------------------------|------|------|-----|------|------|------------------------------------------|------|------------------------------------------|------|
| <i>n</i> | 135        |      | 135                                             |      | 135                                             |      | 45   |     | 45   |      | 45                                       |      | 45                                       |      |
|          | DI         | IR%  | DI                                              | IR%  | DI                                              | IR%  | DI   | IR% | DI   | IR%  | DI                                       | IR%  | DI                                       | IR%  |
| 5 DPI    | 0.24       | 22.2 | 0.21                                            | 20.0 | 0.53                                            | 45.9 | 0.00 | 0.0 | 0.07 | 6.7  | 0.07                                     | 6.7  | 0.33                                     | 33.3 |
| 10 DPI   | 1.40       | 68.1 | 1.71                                            | 80.0 | 1.81                                            | 91.9 | 0.03 | 8.9 | 0.30 | 20.0 | 0.23                                     | 22.2 | 0.57                                     | 68.9 |

**Figure S13.** Hybrids constitutively expressing *rbf1* had greater area of anthocyanin induction and increased infection rates relative to the unaltered hybrid at 5 & 10 DPI. Symptoms were scored after infection of seven-day old *Z. mays* seedlings. Colored bars represent the percentage of plants that developed symptoms, as indicated in the legend. Statistical differences were calculated using Mann-Whitney U tests (\*\*=  $p < 0.01$ ; \*\*\*\* =  $p < 0.0001$ ). The table presents the number of plants infected (*n*), disease index (DI), and infection rate (IR). Three separate experiments were conducted, and combined results are presented.

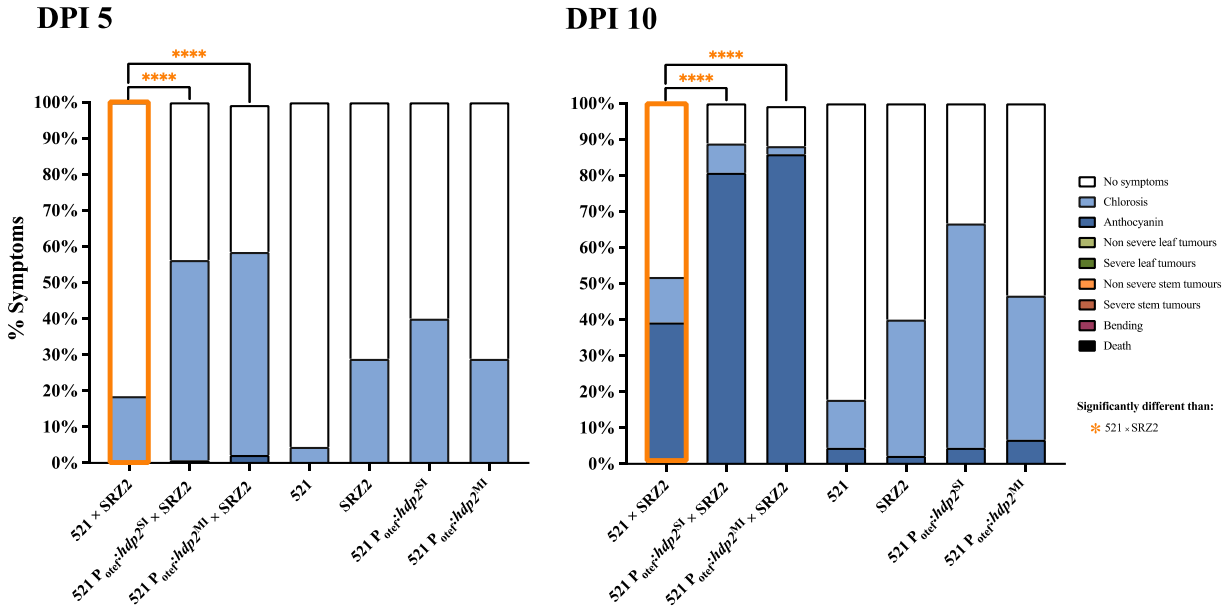

| Strains  | 521 × SRZ2 |      | 521 P <sub>oeft</sub> : <i>hdp2</i> <sup>SI</sup> × SRZ2 |      | 521 P <sub>oeft</sub> : <i>hdp2</i> <sup>MI</sup> × SRZ2 |      | 521  |      | SRZ2 |      | 521 P <sub>oeft</sub> : <i>hdp2</i> <sup>SI</sup> |      | 521 P <sub>oeft</sub> : <i>hdp2</i> <sup>MI</sup> |      |
|----------|------------|------|----------------------------------------------------------|------|----------------------------------------------------------|------|------|------|------|------|---------------------------------------------------|------|---------------------------------------------------|------|
| <i>n</i> | 135        |      | 135                                                      |      | 135                                                      |      | 45   |      | 45   |      | 45                                                |      | 45                                                |      |
|          | DI         | IR%  | DI                                                       | IR%  | DI                                                       | IR%  | DI   | IR%  | DI   | IR%  | DI                                                | IR%  | DI                                                | IR%  |
| 5 DPI    | 0.19       | 18.5 | 0.57                                                     | 56.3 | 0.61                                                     | 59.0 | 0.04 | 4.4  | 0.29 | 28.9 | 0.40                                              | 40.0 | 0.29                                              | 28.9 |
| 10 DPI   | 0.91       | 51.9 | 1.70                                                     | 88.9 | 1.75                                                     | 88.8 | 0.22 | 17.8 | 0.42 | 40.0 | 0.71                                              | 66.7 | 0.53                                              | 46.7 |

**Figure S14.** Hybrids constitutively expressing *hdp2* had greater area of anthocyanin induction and increased infection rates compared to the unaltered hybrid at 5 & 10 DPI. Symptoms were scored after infection of seven-day old *Z. mays* seedlings. Colored bars represent the percentage of plants that developed symptoms, as indicated in the legend. Statistical differences were calculated using Mann-Whitney U tests (\*\*\*\* =  $p < 0.0001$ ). The table presents the number of plants infected (*n*), disease index (DI), and infection rate (IR). Three separate experiments were conducted, and combined results are presented.

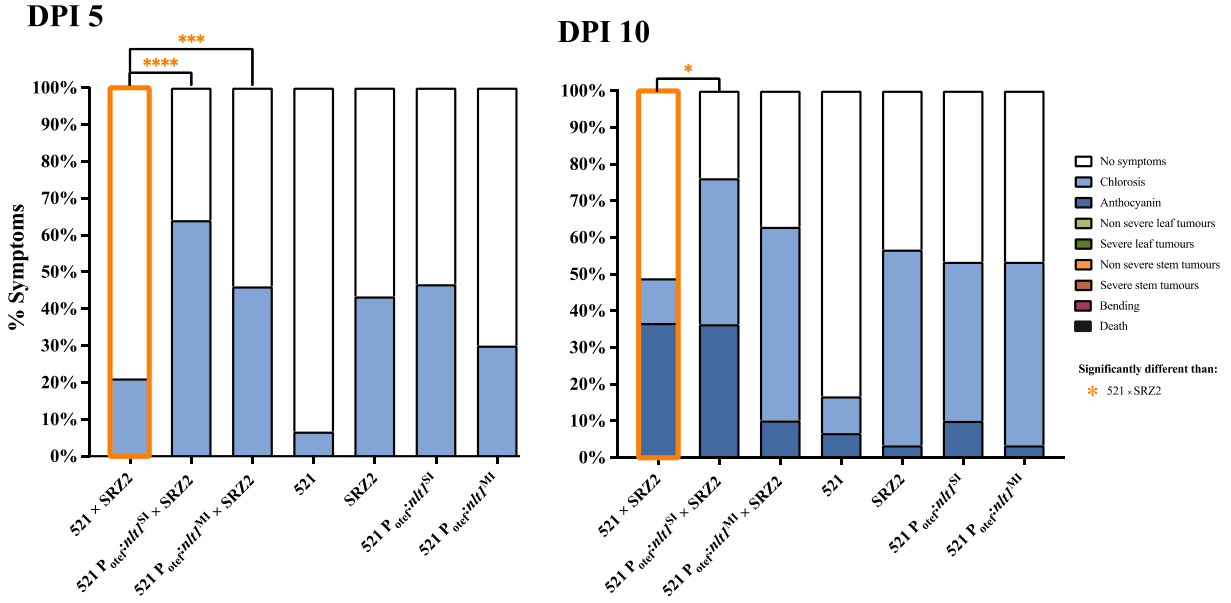

| Strains  | 521 × SRZ2 |       | 521 P <sub>otef:nlt1<sup>SL</sup> × SRZ2</sub> |       | 521 P <sub>otef:nlt1<sup>MI</sup> × SRZ2</sub> |       | 521  |       | SRZ2 |       | 521 P <sub>otef:nlt1<sup>SL</sup></sub> |       | 521 P <sub>otef:nlt1<sup>MI</sup></sub> |       |
|----------|------------|-------|------------------------------------------------|-------|------------------------------------------------|-------|------|-------|------|-------|-----------------------------------------|-------|-----------------------------------------|-------|
| <i>n</i> | 90         |       | 89                                             |       | 89                                             |       | 30   |       | 30   |       | 30                                      |       | 30                                      |       |
|          | DI         | IR%   | DI                                             | IR%   | DI                                             | IR%   | DI   | IR%   | DI   | IR%   | DI                                      | IR%   | DI                                      | IR%   |
| 5 DPI    | 0.21       | 21.00 | 0.64                                           | 64.00 | 0.46                                           | 46.10 | 0.07 | 6.70  | 0.43 | 43.30 | 0.47                                    | 46.70 | 0.30                                    | 30.00 |
| 10 DPI   | 0.86       | 48.90 | 1.13                                           | 76.10 | 0.73                                           | 62.90 | 0.23 | 16.70 | 0.60 | 56.70 | 0.63                                    | 53.30 | 0.57                                    | 53.30 |

**Figure S15.** Hybrids constitutively expressing *nlt1* had lower virulence than the unaltered hybrid at 5 & 10 DPI. Colored bars represent the percentage of plants that developed symptoms, as indicated in the legend. Statistical differences were calculated using Mann-Whitney U tests (\*=  $p < 0.05$ ; \*\*\*=  $p < 0.001$ ; \*\*\*\*=  $p < 0.0001$ ). The table presents the number of plants infected (*n*), disease index (DI), and infection rate (IR). Two separate experiments were conducted, and combined results are presented.

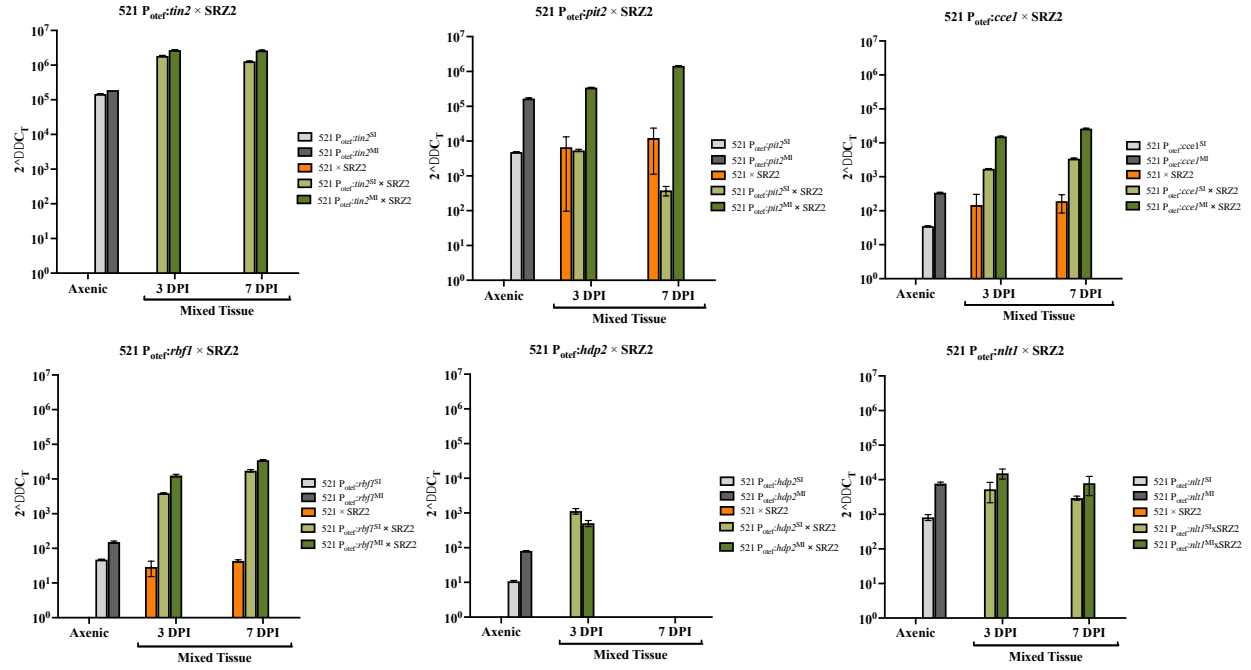

**Figure S16.** RT-qPCR assessment of effector and transcription factor transcript levels during infections with altered hybrids. RNA was isolated from axenically grown haploid cultures and infected plant tissue harvested at DPI 3 and 7. RT-qPCR analysis was performed using three technical replicates for each sample and the housekeeping gene (*gapdh*) transcript levels for normalization. Relative expression was determined using the 2<sup>-ΔΔC<sub>T</sub></sup> method with the axenically grown 521 haploid for reference. One biological replicate is reported. Transcripts from the 521 × SRZ2 infection (Figure 4) were plotted in orange to provide context.

## Supplementary References

1. Heimel, K.; Scherer, M.; Vranes, M.; Wahl, R.; Pothiratana, C.; Schuler, D.; Vincon, V.; Finkernagel, F.; Flor-Parra, I.; Kämper, J. The transcription factor *rbf1* is the master regulator for b-mating type controlled pathogenic development in *Ustilago maydis*. *PLoS Pathog.* 2010, 6, 17–18.
2. Flor-Parra, I.; Vranes, M.; Kamper, J.; Pérez-Martín, J. Biz1, a Zinc Finger Protein Required for Plant Invasion by *Ustilago maydis*, Regulates the Levels of a Mitotic Cyclin. *Plant Cell* **2006**, 18, 2369–2387, doi:10.1105/tpc.106.042754.
3. Pothiratana, C. Functional characterization of the homeodomain transcription factor Hdp1 in *Ustilago maydis*, 2008.
4. Lanver, D.; Berndt, P.; Tollot, M.; Naik, V.; Vranes, M.; Warmann, T.; Münch, K.; Rössel, N.; Kahmann, R. Plant Surface Cues Prime *Ustilago maydis* for Biotrophic Development. *PLoS Pathog.* **2014**, 10, doi:10.1371/journal.ppat.1004272.
5. Donaldson, M.E.; Meng, S.; Gagarinova, A.; Babu, M.; Lambie, S.C.; Swiadek, A.A.; Saville, B.J. Investigating the *Ustilago maydis*/*Zea mays* pathosystem: Transcriptional responses and novel functional aspects of a fungal calcineurin regulatory B subunit. *Fungal Genet. Biol.* **2013**, 58–59, 91–104, doi:10.1016/j.fgb.2013.08.006.
6. Lanver, D.; Müller, A.N.; Happel, P.; Schweizer, G.; Haas, F.B.; Franitza, M.; Pellegrin, C.; Reissmann, S.; Altmüller, J.; Rensing, S.A.; et al. The biotrophic development of *ustilago maydis* studied by RNA-seq analysis. *Plant Cell* **2018**, 30, 300–323, doi:10.1105/tpc.17.00764.
7. Tanaka, S.; Brefort, T.; Neidig, N.; Djamei, A.; Kahnt, J.; Vermerris, W.; Koenig, S.; Feussner, K.; Feussner, I.; Kahmann, R. A secreted *Ustilago maydis* effector promotes virulence by targeting anthocyanin biosynthesis in maize. *Elife* **2014**, 2014, 1–27, doi:10.7554/eLife.01355.001.
8. Mueller, A.N.; Ziemann, S.; Treitschke, S.; Aßmann, D.; Doeblemann, G. Compatibility in the *Ustilago maydis*-Maize Interaction Requires Inhibition of Host Cysteine Proteases by the Fungal Effector Pit2. *PLoS Pathog.* **2013**, 9, doi:10.1371/journal.ppat.1003177.
9. Doeblemann, G.; Van Der Linde, K.; Aßmann, D.; Schwammbach, D.; Hof, A.; Mohanty, A.; Jackson, D.; Kahmann, R. Pep1, a secreted effector protein of *Ustilago maydis*, is required for successful invasion of plant cells. *PLoS Pathog.* 2009, 5.
10. Seitner, D.; Uhse, S.; Gallei, M.; Djamei, A. The core effector Cce1 is required for early infection of maize by *Ustilago maydis*. *Mol. Plant Pathol.* **2018**, 19, 2277–2287, doi:10.1111/mpp.12698.
11. Brachmann, A.; Schirawski, J.; Mu, P.; Kahmann, R. An unusual MAP kinase is required for efficient penetration of the plant surface by *Ustilago maydis*. *EMBO J.* **2003**, 22, 2199–2210.
12. Scherer, M.; Heimel, K.; Starke, V.; Kamper, J. The Clp1 Protein Is Required for Clamp Formation and Pathogenic Development of *Ustilago maydis*. *Plant Cell* **2006**, 18, 2388–2401, doi:10.1105/tpc.106.043521.
13. Heimel, K.; Scherer, M.; Schuler, D.; Kamper, J. The *Ustilago maydis* Clp1 Protein Orchestrates Pheromone and b-Dependent Signaling Pathways to Coordinate the Cell Cycle and Pathogenic Development. *Plant Cell* **2010**, 22, 2908–2922, doi:10.1105/tpc.110.076265.
